# Supplementary material for: Phase and interface engineering of nickel carbide nanobranches for efficient hydrogen oxidation catalysis
Source: Royal Society of Chemistry journal article supplement (doi:10.1039/d1ta08038e), 2021-01-01
Supplement: d1ta08038e1.pdf [file d1ta08038e1.pdf]

Supporting Information

**Phase and Interface Engineering of Nickel Carbide Nanobranches for Efficient Hydrogen Oxidation Catalysis**

Wangjin Ji,<sup>†a</sup> Changhong Zhan,<sup>†b</sup> Deyu Li,<sup>†c</sup> Yong Xu,<sup>\*d</sup> Ying Zhang,<sup>b</sup> Lu Wang,<sup>\*c</sup> Liangbin Liu,<sup>b</sup> Yu Wang,<sup>e</sup> Wenxing Chen,<sup>f</sup> Hongbo Geng,<sup>\*a</sup> Xiaoqing Huang<sup>\*b</sup>

\*yongxu@gdut.edu.cn, lwang22@suda.edu.cn, genghohbo@126.com, hxq006@xmu.edu.cn

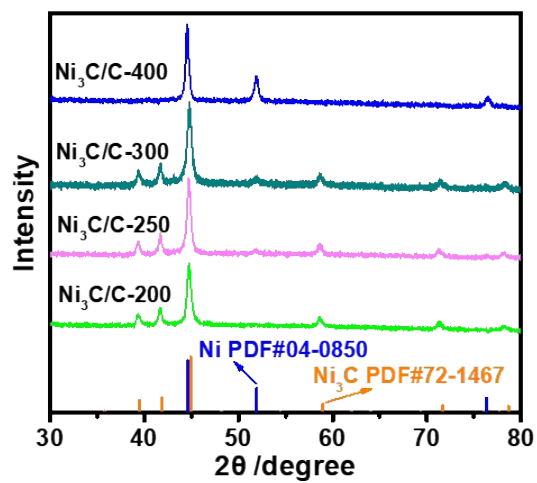

**Figure S1.** XRD patterns of Ni<sub>3</sub>C/C after annealed at different temperatures in 5 % H<sub>2</sub>/Ar.

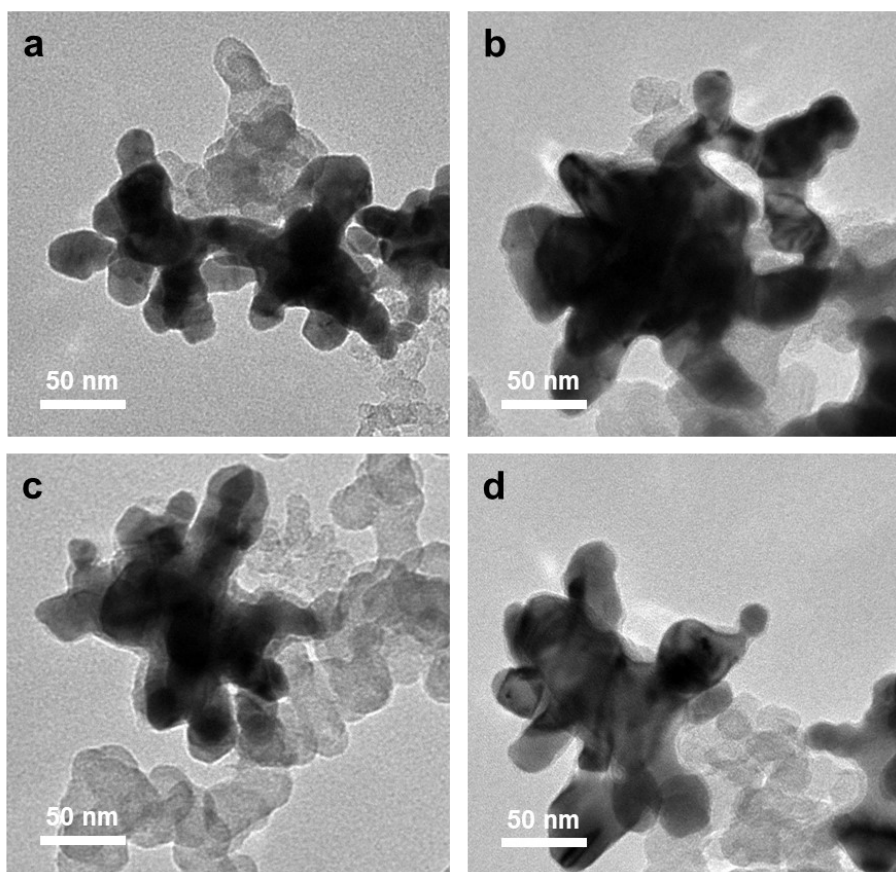

**Figure S2.** TEM images of Ni<sub>3</sub>C/C after annealing at (a) 200 °C, (b) 250 °C, (c) 300 °C, and (d) 400 °C in 5 % H<sub>2</sub>/Ar.

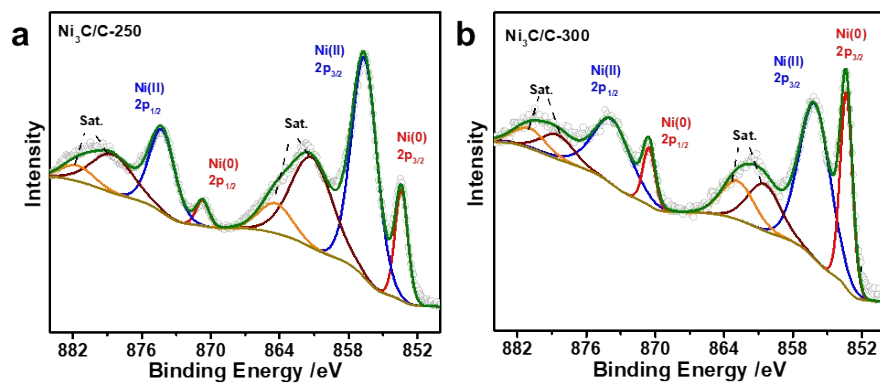

**Figure S3.** XPS spectra of (a) Ni<sub>3</sub>C/C-250 and (b) Ni<sub>3</sub>C/C-300.

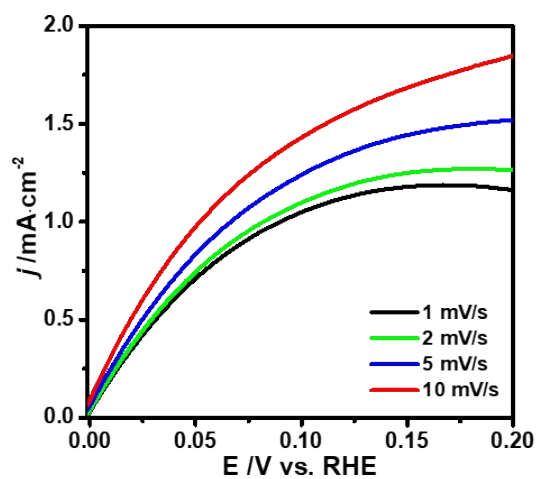

**Figure S4.** HOR polarization curves of Ni<sub>3</sub>C/C-350 in H<sub>2</sub>-saturated 0.1 M KOH at a rotating speed of 1600 rpm with different scan speeds.

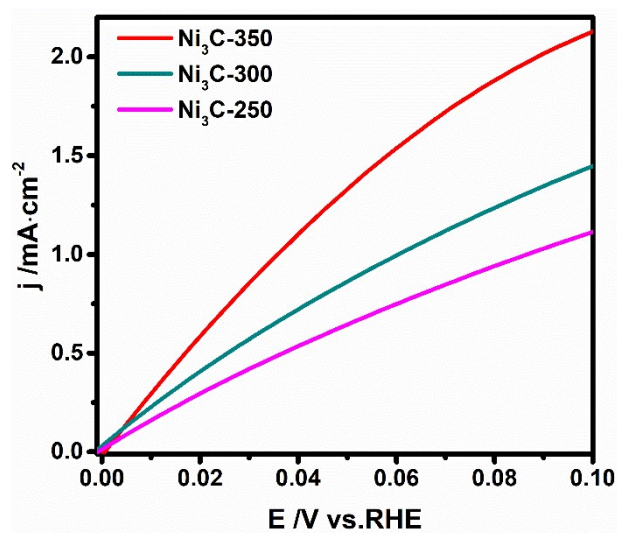

**Figure S5.** HOR polarization curves of Ni<sub>3</sub>C/C-250 and Ni<sub>3</sub>C/C-300 in H<sub>2</sub>-saturated 0.1 M KOH at a rotating speed of 1600 rpm.

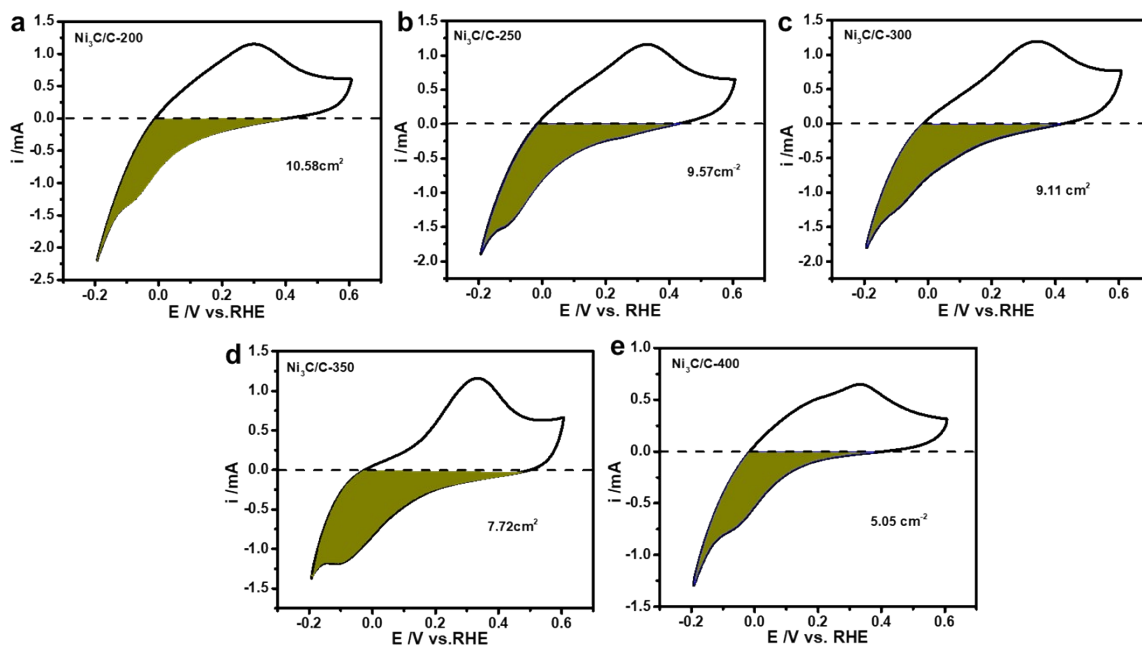

**Figure S6.** CV curves of different catalysts. (a) ECSA for Ni<sub>3</sub>C/C-200 (10.58 cm<sup>2</sup>, catalyst loading: 0.2 mg/cm<sup>2</sup>), (b) ECSA for Ni<sub>3</sub>C/C-250 (9.57 cm<sup>2</sup>, catalyst loading: 0.2 mg/cm<sup>2</sup>), (c) ECSA for Ni<sub>3</sub>C/C-300 (9.11 cm<sup>2</sup>, catalyst loading: 0.2 mg/cm<sup>2</sup>), (d) ECSA for Ni<sub>3</sub>C/C-350 (7.72 cm<sup>2</sup>, catalyst loading: 0.2 mg/cm<sup>2</sup>), and (e) ECSA for Ni<sub>3</sub>C/C-400 (5.05 cm<sup>2</sup>, catalyst loading: 0.2 mg/cm<sup>2</sup>).

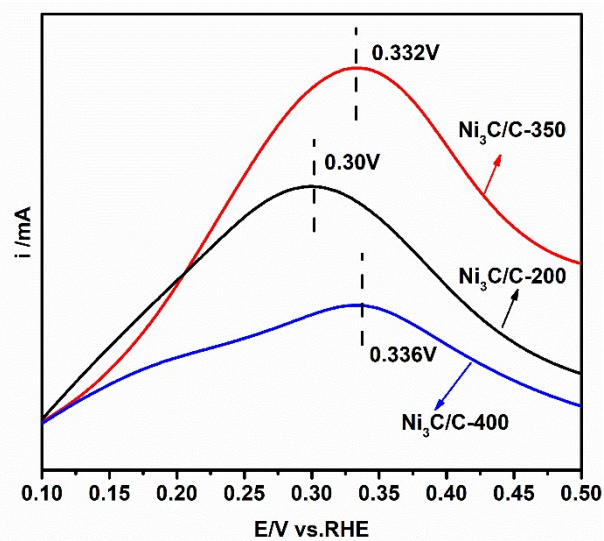

**Figure S7.** Anodic LSV scans in 0.1 M Ar-saturated KOH electrolyte showing the  $OH_{ads}$  oxidative adsorption peaks (scan rate:  $50 \text{ mV}\cdot\text{s}^{-1}$ ) of Ni<sub>3</sub>C/C-200, Ni<sub>3</sub>C/C-350 and Ni<sub>3</sub>C/C-400.



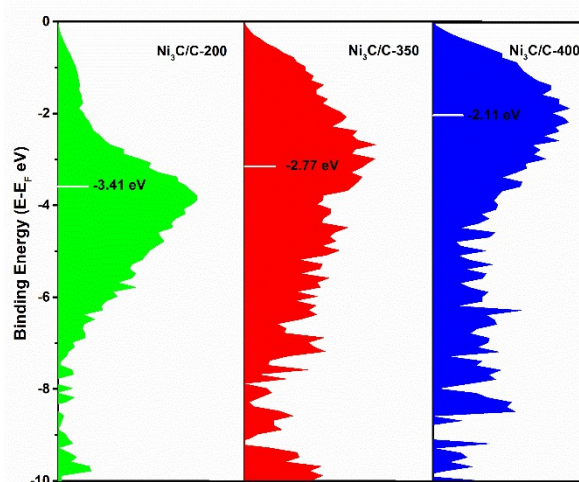

**Figure S8.** Surface valence band photoemission spectra of Ni<sub>3</sub>C/C-200, Ni<sub>3</sub>C/C-350 and Ni<sub>3</sub>C/C-400.

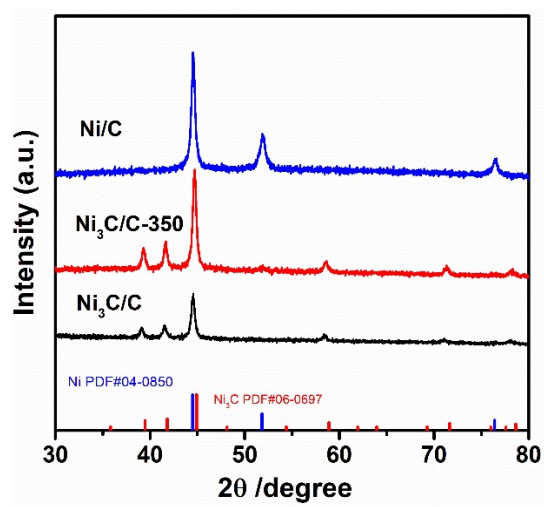

**Figure S9.** XRD patterns of of Ni/C, Ni<sub>3</sub>C/C and Ni<sub>3</sub>C/C-350.

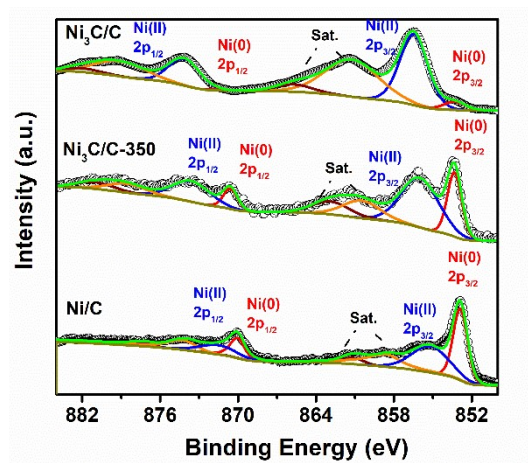

**Figure S10.** XPS spectra of Ni<sub>3</sub>C/C, Ni<sub>3</sub>C/C-350 and Ni/C.

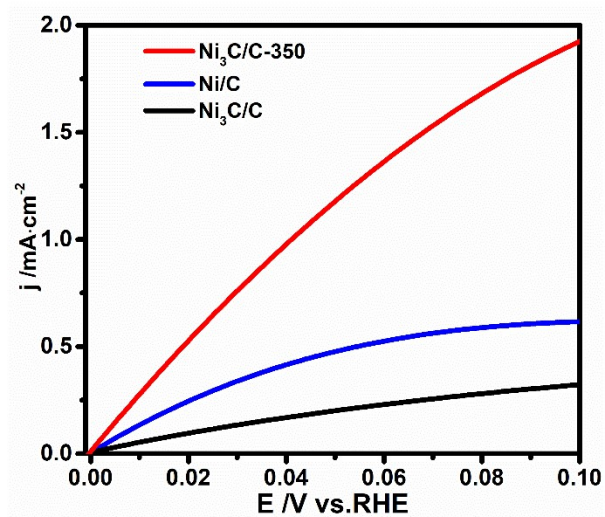

**Figure S11.** HOR polarization curves of Ni/C, Ni<sub>3</sub>C/C and Ni<sub>3</sub>C/C-350 in H<sub>2</sub>-saturated 0.1 M KOH at a rotating speed of 1600 rpm.

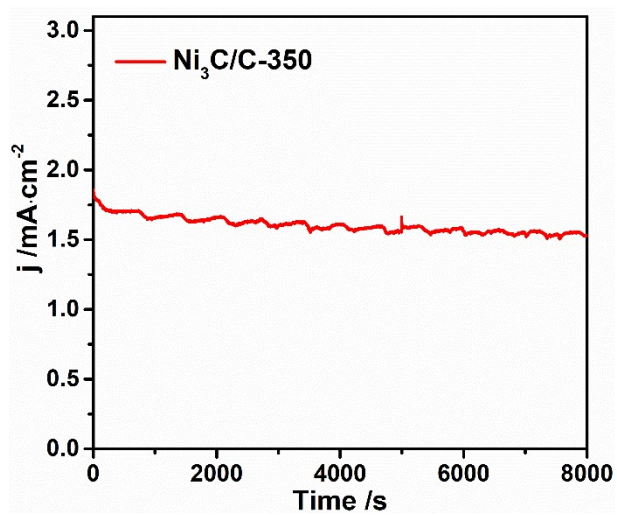

**Figure S12.** Relative current-time chronoamperometry response of Ni<sub>3</sub>C/C-350 at 0.05 V versus RHE.

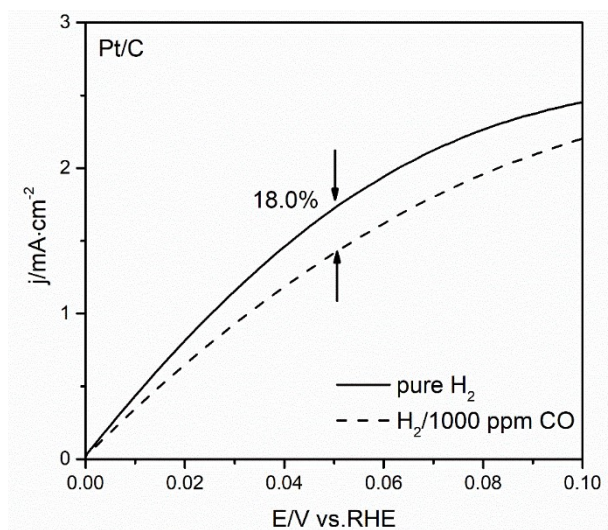

**Figure S13.** The polarization curves of Pt/C collected with and without 1000 ppm CO. The scan rate is 1 mV/s and the rotation speed is 1600 rpm.

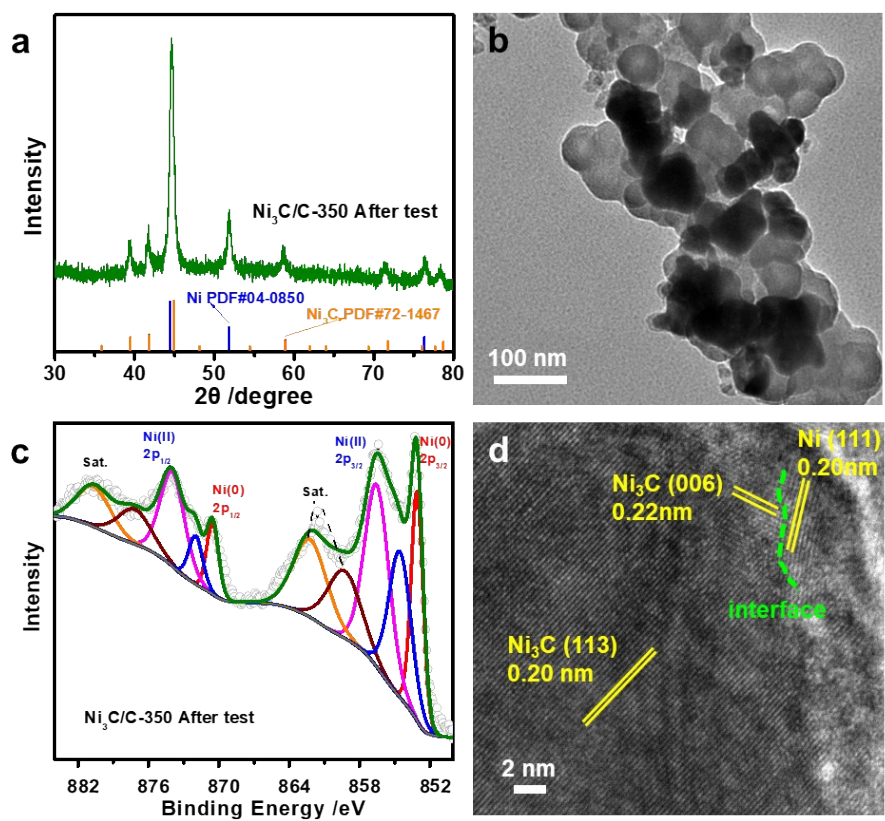

**Figure S14.** (a) XRD pattern, (b) TEM image, (c) XPS spectrum and (d) HRTEM of the spent  $\text{Ni}_3\text{C}/\text{C}-350$  after long-term durability test.

**Table S1. The ratio of Ni<sup>0</sup>:Ni<sup>2+</sup> obtained from XPS fitting.**

| Samples                           | Ni <sub>3</sub> C/C-200 | Ni <sub>3</sub> C/C-250 | Ni <sub>3</sub> C/C-300 | Ni <sub>3</sub> C/C-350 | Ni <sub>3</sub> C/C-400 |
|-----------------------------------|-------------------------|-------------------------|-------------------------|-------------------------|-------------------------|
| Ni <sup>0</sup> :Ni <sup>2+</sup> | 0.17                    | 0.29                    | 0.45                    | 0.49                    | 1.17                    |



**Table S2. Results from EXAFS fitting.**

| Sample                  | Path  | CN      | R(Å)      | $\sigma^2(\times 10^{-3}\text{Å}^2)$ | $\Delta E_0$ (eV) | R factor |
|-------------------------|-------|---------|-----------|--------------------------------------|-------------------|----------|
| Ni foil                 | Ni-Ni | 12      | 2.48±0.01 | 6.0±0.2                              | 5.6±0.4           | 0.002    |
| Ni <sub>3</sub> C/C-200 | C-Ni  |         | 1.79±0.03 | 10.6±7                               | -8.3±4.7          | 0.005    |
|                         | Ni-Ni | 6.3±1.4 | 2.60±0.02 | 12.5±2.0                             | 1.5±1.8           |          |
| Ni <sub>3</sub> C/C-350 | C-Ni  | 1.6±1.5 | 1.78±0.04 | 6.3±1.9                              | 7.6±1.4           | 0.005    |
|                         | Ni-Ni | 8.5±2.2 | 2.51±0.03 | 9.2±2.7                              | 5.8±2.3           |          |
| Ni <sub>3</sub> C/C-400 | Ni-Ni | 8.7±0.1 | 2.48±0.05 | 4.3±0.5                              | 6.2±0.9           | 0.009    |

**Table S3. Comparison of Ni<sub>3</sub>C/C-350 and the reported catalysts for HOR in 0.1 M KOH.**

| Catalyst                             | Loading<br>(mg cm <sup>-2</sup> ) | Rotating<br>Speed (rpm) | $j^k$<br>(mA<br>cm <sup>-2</sup> ) | $j^0$<br>(mA<br>cm <sup>-2</sup> ) | $j^0_{\text{ECAS}}$<br>(mA cm <sup>-2</sup> ) | Ref.                                               |
|--------------------------------------|-----------------------------------|-------------------------|------------------------------------|------------------------------------|-----------------------------------------------|----------------------------------------------------|
| Ni <sub>3</sub> C/C-350              | 0.2                               | 1600                    | 2/72                               | 0.96                               | 0.031                                         | This work                                          |
| Ni <sub>3</sub> C/C-400              | 0.2                               | 1600                    | 2.18                               | 0.81                               | 0.031                                         | This work                                          |
| Ni/N-CNT                             | 0.25                              | 2500                    | 2.33                               | 0.8857                             | 0.028                                         | Nat. Commun., 2016, <b>7</b> ,<br>10141.           |
| CeO <sub>2</sub> (r)-<br>Ni/C-1      | 0.141                             | 2500                    | 1.73                               | 1.07                               | 0.038                                         | Angew. Chem. Int. Ed., 2019,<br><b>58</b> , 14179. |
| Ni <sub>4</sub> Mo                   | 0.5                               | 1600                    | 33.8                               | 3.41                               | 0.065                                         | Nat. Commun., 2020, <b>11</b> ,<br>4789            |
| Ni <sub>4</sub> Mo                   | 0.2                               | 1600                    | 10.72                              | 2.82                               | -                                             | Angew. Chem. Int. Ed., 2021,<br><b>60</b> , 5771   |
| Ni-H <sub>2</sub> -2%                | 0.116                             | 2500                    | 5.85                               | 2.9                                | 0.028                                         | Angew. Chem. Int. Ed., 2020,<br><b>59</b> , 10797. |
| np-Ni <sub>3</sub> N                 | 0.16                              | 1600                    | 4.76                               | 1.65                               | -                                             | Energy Environ. Sci., 2019,<br><b>12</b> , 3522.   |
| Ni <sub>3</sub> N/C                  | 0.16                              | 2500                    | 3.90                               | 1.89                               | 0.014                                         | Angew. Chem. Int. Ed., 2020,<br><b>58</b> , 7745   |
| Ni/NiO/C-<br>700                     | 0.32                              | 1600                    | 1.59                               | -                                  | 0.026                                         | Angew. Chem. Int. Ed., 2019,<br><b>58</b> , 10644. |
| Ni <sub>9</sub> Mo <sub>1</sub> /KB  | 0.1                               | 1600                    | -                                  | -                                  | 0.027                                         | J. Mater. Chem. A, 2017, <b>5</b> ,<br>24433.      |
| Ni <sub>9</sub> 5Cu <sub>5</sub> /KB | 0.1                               | 1600                    | -                                  | -                                  | 0.025                                         | Sustain. Energy Fuels, 2018,<br><b>2</b> , 2268.   |
| NiB-300                              | 0.142                             | 2500                    | -                                  | -                                  | 0.026                                         | Chem. Sci., 2020, <b>11</b> , 12118                |
| Ni <sub>3</sub> @BN/C                | 0.25                              | 2500                    | -                                  | 0.84                               | 0.023                                         | Chem. Sci., 2017, <b>8</b> , 5728                  |
